# Supplementary material for: Host Diversity and Origin of Zoonoses: The Ancient and the New
Source: PubMed Central journal article supplement (PMC7552289; doi:10.3390/ani10091672), 2020-09-17
Supplement: animals-10-01672-s001.pdf [file animals-10-01672-s001.pdf]

Table S1. Selected bacterial zoonoses \*.

| Disease                                              | Causative Pathogen                                | Region                                                                                                  | Main Reservoirs                                                                   | Mode of Transmission to Humans                                                                                                                            |
|------------------------------------------------------|---------------------------------------------------|---------------------------------------------------------------------------------------------------------|-----------------------------------------------------------------------------------|-----------------------------------------------------------------------------------------------------------------------------------------------------------|
| Anthrax                                              | <i>Bacillus anthracis</i>                         | Africa, Asia, South America, Middle East, parts of Europe                                               | Cattle, sheep, goats, horses (most mammals), some birds                           | Occupational contact exposure, ingestion/foodborne, rarely airborne                                                                                       |
| Campylobacteriosis                                   | <i>Campylobacter</i> spp                          | Worldwide                                                                                               | Poultry, farm animals, wild birds                                                 | Foodborne (raw meat, milk) and direct contact with infected animals (fecal/oral)                                                                          |
| Chlamydiosis                                         | <i>Chlamydia abortus</i> , <i>C. felis</i>        | <i>C. abortus</i> worldwide; <i>C. felis</i> in most sheep-raising areas (not Australia or New Zealand) | <i>C. abortus</i> in sheep, goats, cattle, other mammals; <i>C. felis</i> in cats | Contact with animals                                                                                                                                      |
| Enterohemorrhagic <i>Escherichia coli</i> infections | <i>E. coli</i> O157:H7 and other types/serogroups | Worldwide                                                                                               | Cattle, sheep, goats, bison, deer, pigs, other mammals, birds                     | Ingestion of undercooked meat (ground beef), vegetables, or contaminated water; direct contact with feces or contaminated soil                            |
| Leptospirosis                                        | <i>Leptospira</i> spp.                            | Worldwide                                                                                               | Reservoir hosts include rodents, dogs, cattle, pigs, farmed red deer, others      | Occupational and recreational exposure, or exposure to urban rodent-contaminated material, especially skin, mucous membrane contact; water- and foodborne |
| Listeriosis                                          | <i>Listeria monocytogenes</i>                     | Worldwide                                                                                               | Cattle, sheep, soil                                                               | Foodborne via unpasteurized dairy, raw meat, fish, vegetables, contaminated water or soil, direct contact with animals and nosocomial                     |
| Lyme disease                                         | <i>Borrelia burgdorferi</i>                       | North America, cases reported in Europe, Australia, parts                                               | Ticks, rodents, sheep, small mammals                                              | <i>Ixodes</i> spp. bite                                                                                                                                   |

|                                                                      |                                                                                                                      | of Asia, and the Amazon                                  |                                                                                                           |                                                                                                                                                                    |
|----------------------------------------------------------------------|----------------------------------------------------------------------------------------------------------------------|----------------------------------------------------------|-----------------------------------------------------------------------------------------------------------|--------------------------------------------------------------------------------------------------------------------------------------------------------------------|
| Methicillin-resistant <i>Staphylococcus aureus</i> (MRSA) infections | <i>S. aureus</i> with <i>mecA</i> gene; some strains maintained in animals or people but animals can become carriers | Worldwide                                                | Pigs; cats and dogs mainly acquire strains from people; other mammals (horses, cattle); birds and poultry | Usually by direct contact with asymptomatic carrier animals; other routes also described; can be nosocomial in hospitals                                           |
| Plague                                                               | <i>Yersinia pestis</i>                                                                                               | Foci in North and South America, Middle East, and Africa | Rodents and their fleas; some mammals including cats                                                      | Flea bite, scratches or bites from infected cats, handling infected animals or tissues                                                                             |
| Q (query) fever                                                      | <i>Coxiella burnetii</i>                                                                                             | Worldwide                                                | Cattle, sheep, goats, cats, dogs, birds, and possibly capybara and kangaroos                              | Mainly aerosol, direct contact with and exposure to the animal placenta and birth tissues and excreta                                                              |
| Salmonellosis                                                        | <i>Salmonella</i> spp.                                                                                               | Worldwide                                                | Poultry, cattle, pigs, widespread in mammals, birds, reptiles, amphibians                                 | Direct animal contact, raw meat, food, and fecal-oral infection                                                                                                    |
| Streptococcal infections                                             | <i>Streptococcus</i> spp.                                                                                            | Worldwide                                                | Swine, horses, dogs, cats, fish                                                                           | Ingestion of unpasteurized dairy products, pork; direct contact often through broken skin; <i>S. pyogenes</i> can colonize bovine udder and be transmitted in milk |
| Yersiniosis                                                          | <i>Yersinia pseudotuberculosis</i> , <i>Y. enterocolitica</i>                                                        | Worldwide                                                | Many domestic and wild mammals, pigs are the main reservoir                                               | Ingestion of raw or undercooked pork, fresh milk, and dairy                                                                                                        |
| Zoonotic diphtheria                                                  | <i>Corynebacterium ulcerans</i>                                                                                      | Probably worldwide, human incidence may be increasing    | Cattle, farm animals, dogs, cats, ferrets                                                                 | Direct contact, unpasteurized milk consumption                                                                                                                     |

\* Diseases information sources: Merck Veterinary Manual [28]; GOV.UK [29]

**Table S2.** Selected viral zoonoses \*.

| Disease                         | Causative Pathogen                                                 | Region                                                                      | Main Reservoirs                                                                           | Mode of Transmission to Humans                                                                                          |
|---------------------------------|--------------------------------------------------------------------|-----------------------------------------------------------------------------|-------------------------------------------------------------------------------------------|-------------------------------------------------------------------------------------------------------------------------|
| Avian and Swine influenza A     | Genus <i>Influenzavirus A</i> ; swine H3N2, H1N1, avian H5N1, H7N9 | Worldwide                                                                   | Wild and domestic birds, especially poultry; pigs and turkeys                             | Usually, contact with infected animals shed in respiratory secretions                                                   |
| Buffalopox virus infection      | Vaccinia virus, Buffalopox strain (genus <i>Orthopoxvirus</i> )    | Indian subcontinent (South Asia), Egypt, Indonesia                          | Water buffalo, cattle                                                                     | Skin contact with infected animals, often when milking                                                                  |
| Cowpox                          | Cowpox virus genus <i>Orthopoxvirus</i>                            | Parts of Europe and Asia                                                    | Rodents, wild and domestic cats                                                           | Direct contact (broken skin, bites, scratches)                                                                          |
| Crimean-Congo hemorrhagic fever | Crimean-Congo hemorrhagic fever virus genus <i>Nairovirus</i>      | Africa, Middle East, Central Asia, Southeastern Europe, it may be spreading | Livestock (cattle, sheep, goats), some birds, ticks                                       | Tick bites, direct contact with animal blood, unpasteurized milk ingestion                                              |
| Ebola hemorrhagic fever         | Ebola virus                                                        | Africa                                                                      | Bats are suspected reservoir, primates                                                    | Contact with infected primate tissues, possible transmission from cave bats                                             |
| Foot-and-mouth disease          | Foot-and-mouth disease virus (genus <i>Aphthovirus</i> )           | Asia, Africa, Middle East, South America                                    | Cattle, swine, sheep, goats, others                                                       | Contact exposure                                                                                                        |
| Hantavirus syndromes            | Hantaviruses                                                       | The Americas, Europe, Asia                                                  | Rodents, maybe insectivorous species (shrews and moles), bats                             | Aerosolized excreta, bites, and direct contact of human broken skin with rodents                                        |
| Hepatitis E                     | Hepatitis E virus                                                  | Worldwide                                                                   | Pigs, wild boar, deer, maybe camels                                                       | Undercooked animal meat consumption, fecal-oral spread                                                                  |
| Lassa fever                     | Lassa virus (genus <i>Arenavirus</i> )                             | West Africa                                                                 | Wild rodents (multimammate rat)                                                           | Contact with rodent excretions, secretions, or tissues; aerosol                                                         |
| Nipah virus infection           | Nipah virus (genus <i>Henipavirus</i> )                            | Malaysia, Bangladesh, and northern India                                    | Fruit bats, sometimes swine                                                               | Direct contact with contaminated pigs or infected tissue, bat-to-human transmission (contaminated juice, date palm sap) |
| Rabies                          | Genus <i>Lyssavirus</i> and related lyssaviruses                   | Worldwide with some exceptions                                              | Dogs, foxes, bats, cats                                                                   | Bites of diseased animals; aerosols in closed environments                                                              |
| Rift Valley fever               | Rift Valley fever virus genus <i>Flavivirus</i> )                  | Africa, foci in Arabian peninsula, Indian subcontinent                      | Cattle, goats, sheep, buffalo, camels, nonhuman primates, squirrels, puppies, and kittens | Mosquito bites, contact with tissues                                                                                    |

|                                     |                                               |                           |                    |                                    |
|-------------------------------------|-----------------------------------------------|---------------------------|--------------------|------------------------------------|
| West Nile fever and virus infection | West Niles virus (genus <i>Flavivirus</i> )   | East and West hemispheres | Mostly birds       | Mosquito bite ( <i>Culex</i> spp.) |
| Yellow fever                        | Yellow fever virus (genus <i>Flavivirus</i> ) | South America and Africa  | Non-human primates | Mosquito bite                      |

\*Diseases information sources: Merck Veterinary Manual [28]; GOV.UK [29] For coronavirus zoonoses see Table 2.

**Table S3.** Selected parasitic and other non-bacterial non-viral zoonoses \*.

| Disease                                                     | Causative Pathogen                           | Region                                                                           | Main Reservoirs                                                                                 | Mode of Transmission to Humans                                                                                                                                   |
|-------------------------------------------------------------|----------------------------------------------|----------------------------------------------------------------------------------|-------------------------------------------------------------------------------------------------|------------------------------------------------------------------------------------------------------------------------------------------------------------------|
| Onchocerciasis                                              | <i>Onchocerca</i> Spp.                       | Species-specific; mostly Europe, the USA, and Japan                              | Cattle, horses, cervids, wild boars, dogs and other canids, camels                              | Probably transmitted by black flies                                                                                                                              |
| Pork tapeworm disease; cysticercosis and neurocysticercosis | <i>Taenia solium</i> ,<br><i>Taenia</i> spp. | Worldwide where swine are reared; mostly Africa, Asia, Central and South America | People, pigs, cattle, and other mammals as intermediate hosts                                   | Ingestion of undercooked pork with larvae causes taeniasis; ingestion of eggs (including autoinfection from an adult worm in the intestine) causes cysticercosis |
| Toxoplasmosis                                               | <i>Toxoplasma gondii</i>                     | Worldwide                                                                        | Domestic cats; other mammals including livestock, deer, and birds considered intermediate hosts | Ingestion of oocysts in feces of infected cats (including contaminated soil, food, water) or tissue cysts in undercooked meat or unpasteurized milk              |
| Variant Creutzfeldt-Jakob (mad cow) disease                 | Bovine spongiform encephalopathy prion       | Most cases in the UK                                                             | Cattle and other ruminants, cats and other felids, lemurs                                       | Ingestion of bovine products contaminated with CNS tissues                                                                                                       |

\* Diseases information sources: Merck Veterinary Manual [28]; GOV.UK [29]
